# Supplementary material for: Modelling of Immune Checkpoint Network Explains Synergistic Effects of Combined Immune Checkpoint Inhibitor Therapy and the Impact of Cytokines in Patient Response
Source: MDPI journal article supplement (doi:10.3390/cancers12123600), 2020-12-02

Before treatment

Non responders

CD8 cells - responders - before treatment

Responders

ICs:  
TIM3\_L  
LAG3\_L  
TIGIT\_L  
PD1\_L  
TNFRs\_L  
ICOS\_L

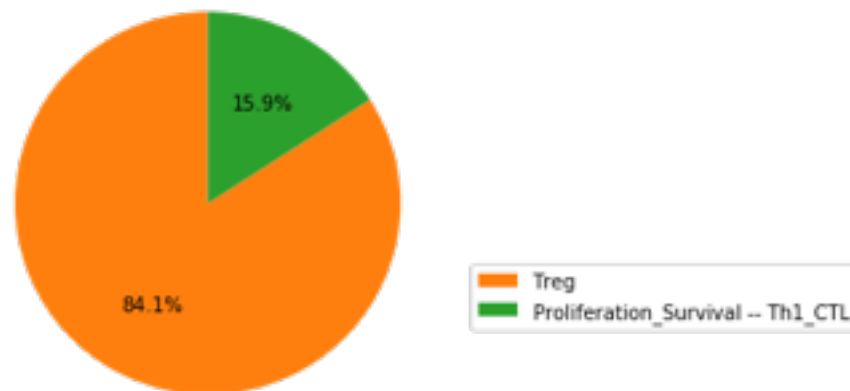

ICs:  
LAG3\_L  
TIGIT\_L  
TIGIT  
PD1\_L  
PD1  
TNFRs\_L  
ICOS\_L  
IFNG  
IL12R  
STAT4  
Tbet

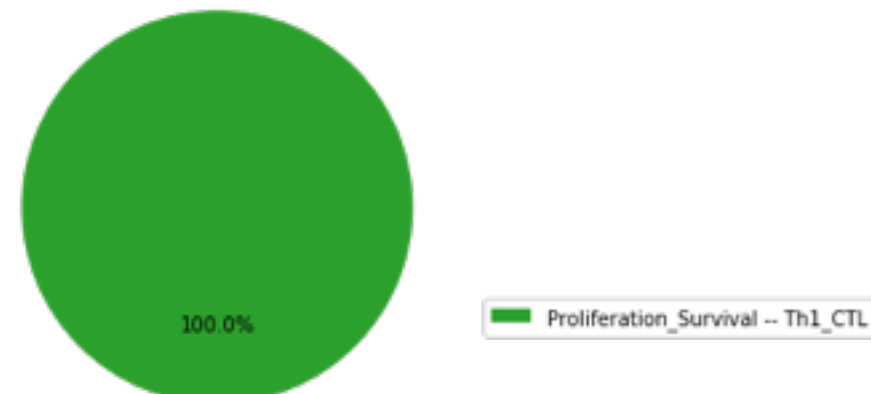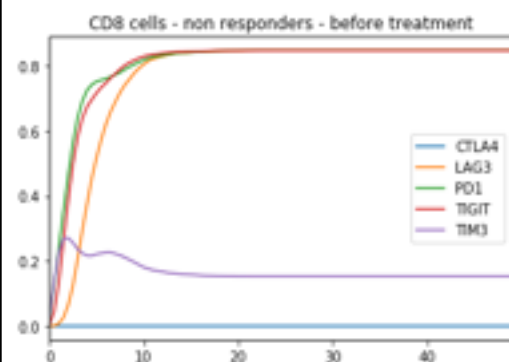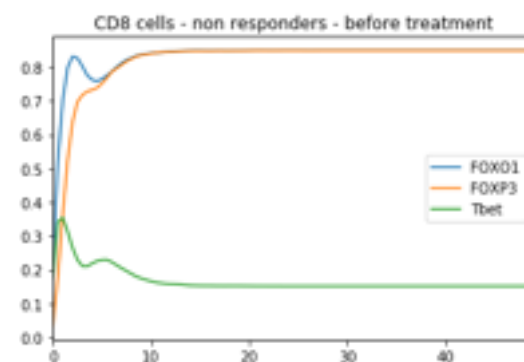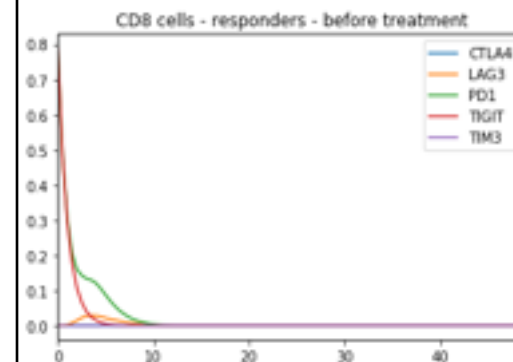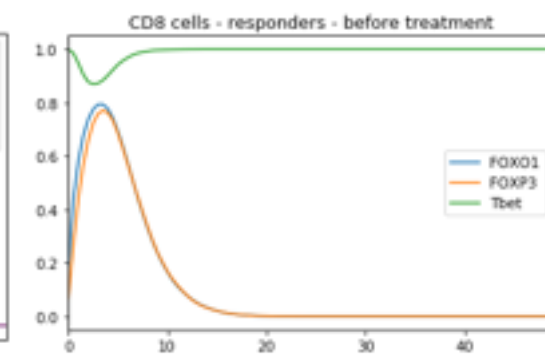

After treatment

CD8+ - anti-PD1 treatment - non responders

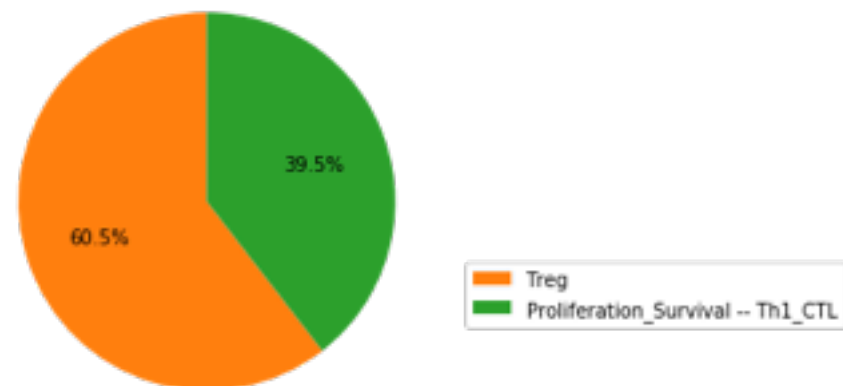

CD8+ - anti-PD1 treatment - responders

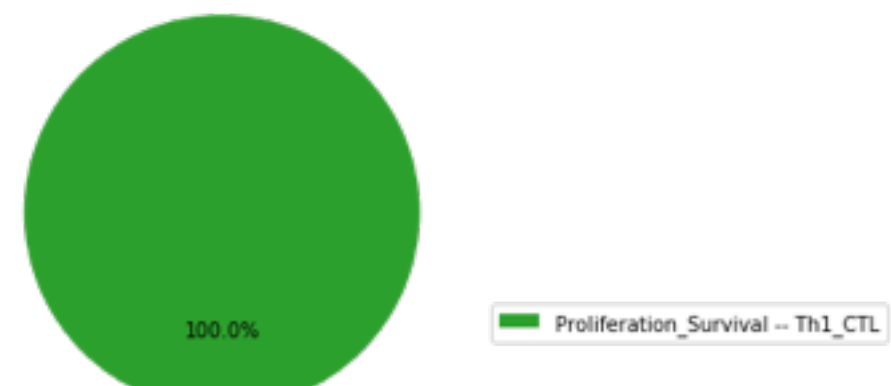

Supplement: s1 [file s1]
