# Supplementary figures and images for: Modelling of Immune Checkpoint Network Explains Synergistic Effects of Combined Immune Checkpoint Inhibitor Therapy and the Impact of Cytokines in Patient Response
Source: MDPI journal article supplement (doi:10.3390/cancers12123600), 2020-12-02

## Role of the transcription factors

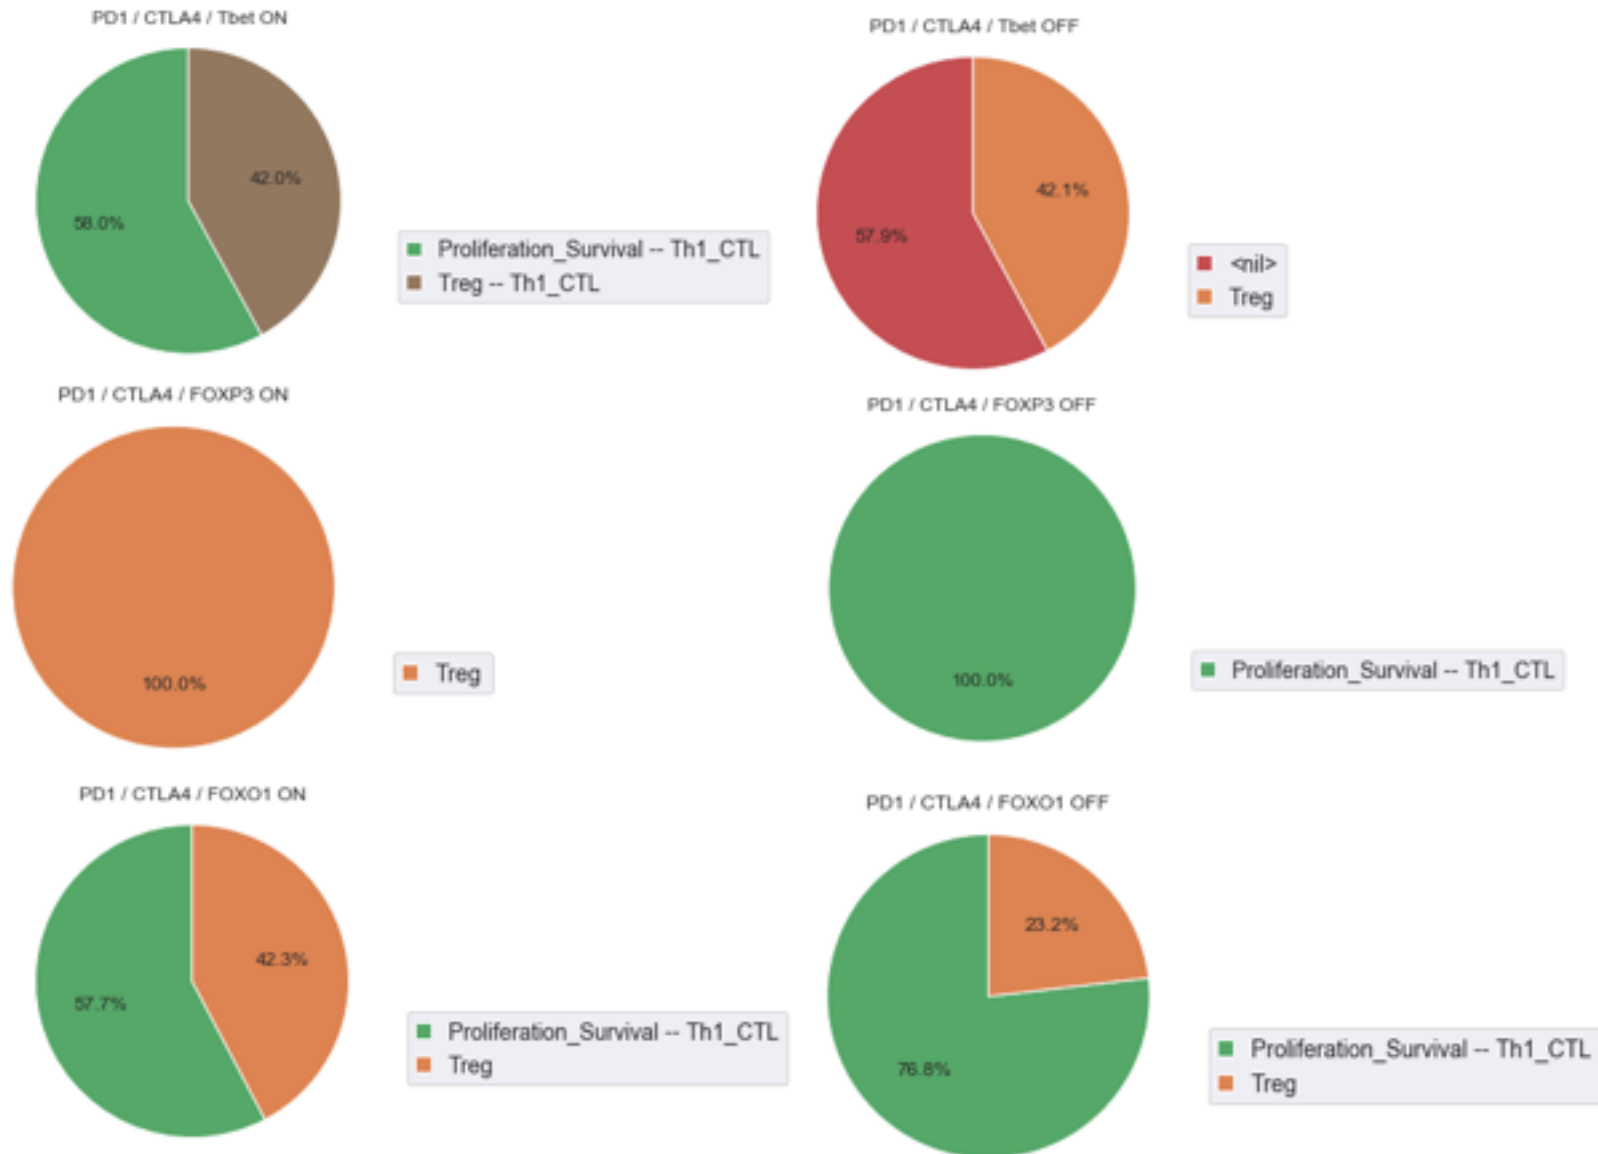

## Role of STAT1 and STAT3

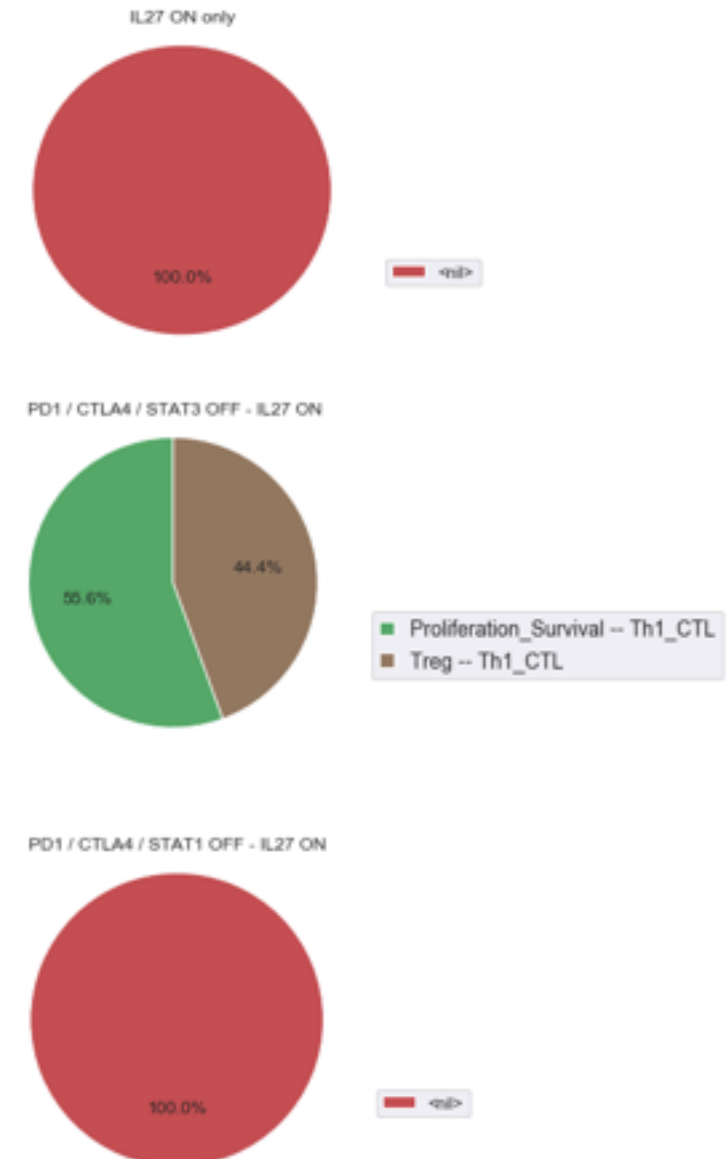

Supplement: s1 [file s1]
